# Supplementary material for: Synergetic effect between Pd2+ and Ir4+ species promoting direct ethane dehydrogenation into ethylene over bimetallic PdIr/AC catalysts
Source: Royal Society of Chemistry journal article supplement (doi:10.1039/d2cy00413e), 2022-01-01
Supplement: d2cy00413e1.pdf [file d2cy00413e1.pdf]

## **Supporting Information**

### **Synergetic Effect between Pd<sup>2+</sup> and Ir<sup>4+</sup> Species Promoting Direct Ethane Dehydrogenation into Ethylene over Bimetallic PdIr/AC Catalysts**

#### **The synthesis of Pd7Ir2/AC-B-N**

In order to evaluate the nano-particles' catalytic activity, we prepared Pd7Ir2/AC-B-N mainly possessing nano-particles without atomically dispersed Pd/Ir species. Firstly, 0.2 g AC-B support and equal weight of (3-aminopropyl)triethoxysilane (APTES) were dispersed in 20 mL water and sonicated for 30 min at RT, and then 1.40 mL Pd (0.1 M, Na<sub>2</sub>PdCl<sub>4</sub> from Aladdin) and 0.24 mL Ir (0.1 M, H<sub>2</sub>IrCl<sub>6</sub> from Aladdin) were added into the solution with fiercely stirring. After 4 hrs agitation, the solution was filtrated by distilled water and then the filter cake was dried by freeze dryer and calcined under N<sub>2</sub> at 500 °C for 1 h. The ICP results presented the Pd and Ir contents were 6.0% and 1.5%. The morphology of this sample was shown in Fig. S12.

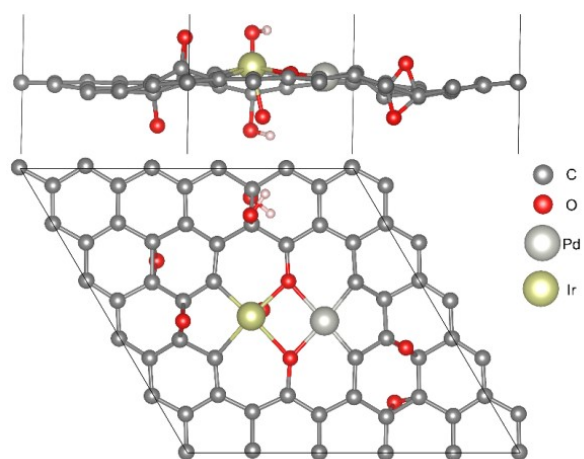

Figure S1. Side and Top view of Pd-Ir/AC with O species

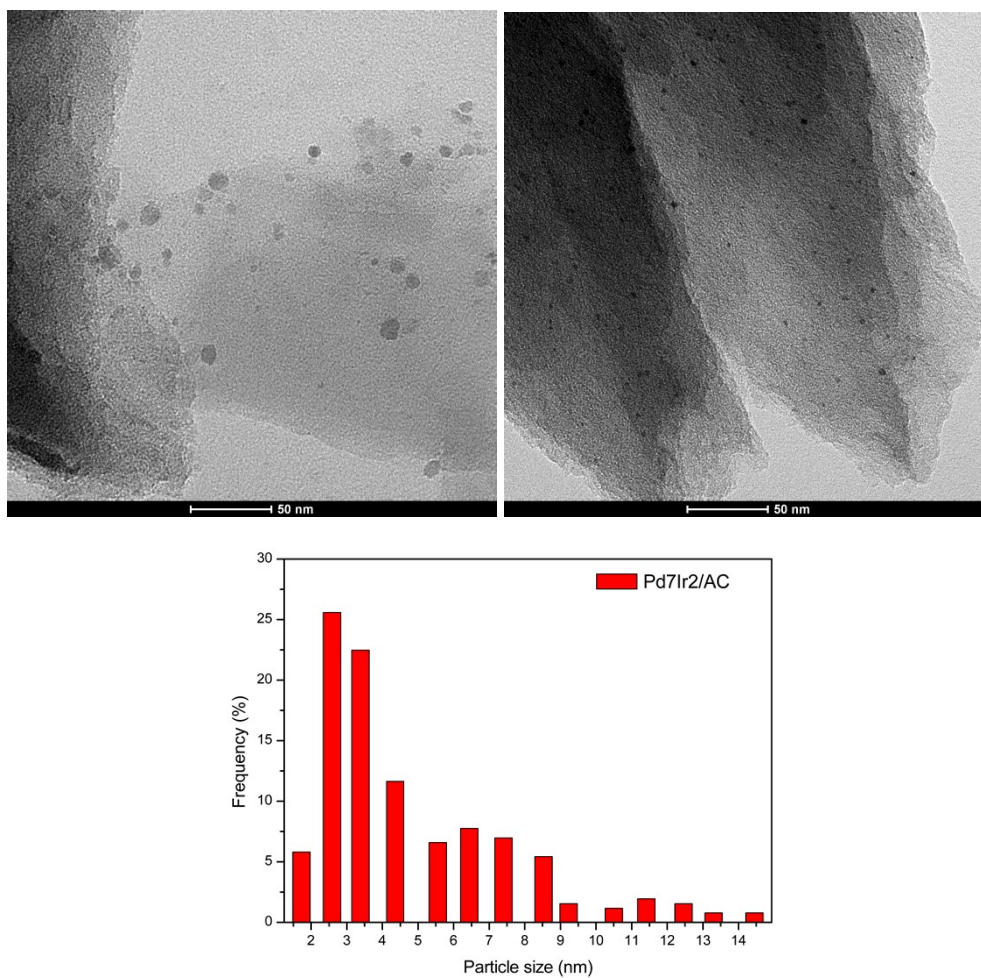

Figure S2 TEM images of Pd<sub>7</sub>Ir<sub>2</sub>/AC with the corresponding particle size distributions

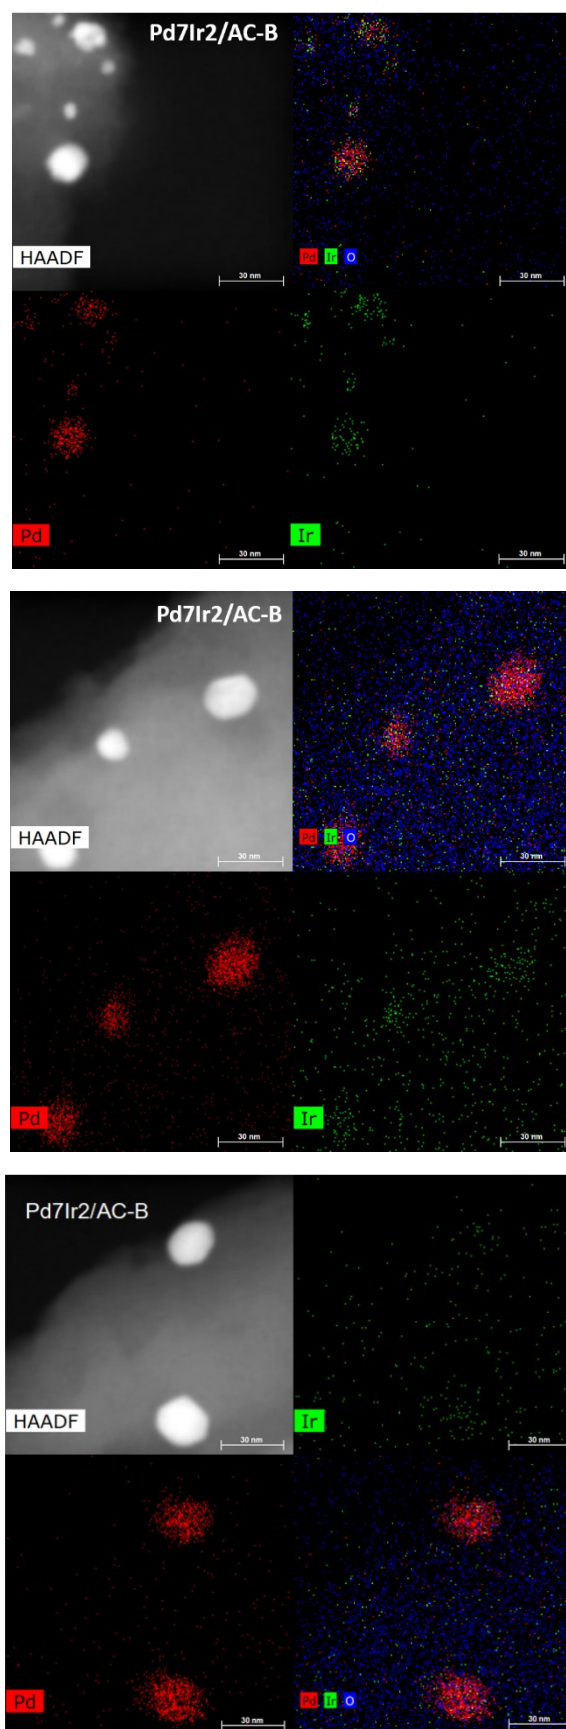

Figure S3 STEM images of Pd, Ir and O mapping over fresh Pd<sub>7</sub>Ir<sub>2</sub>/AC-B

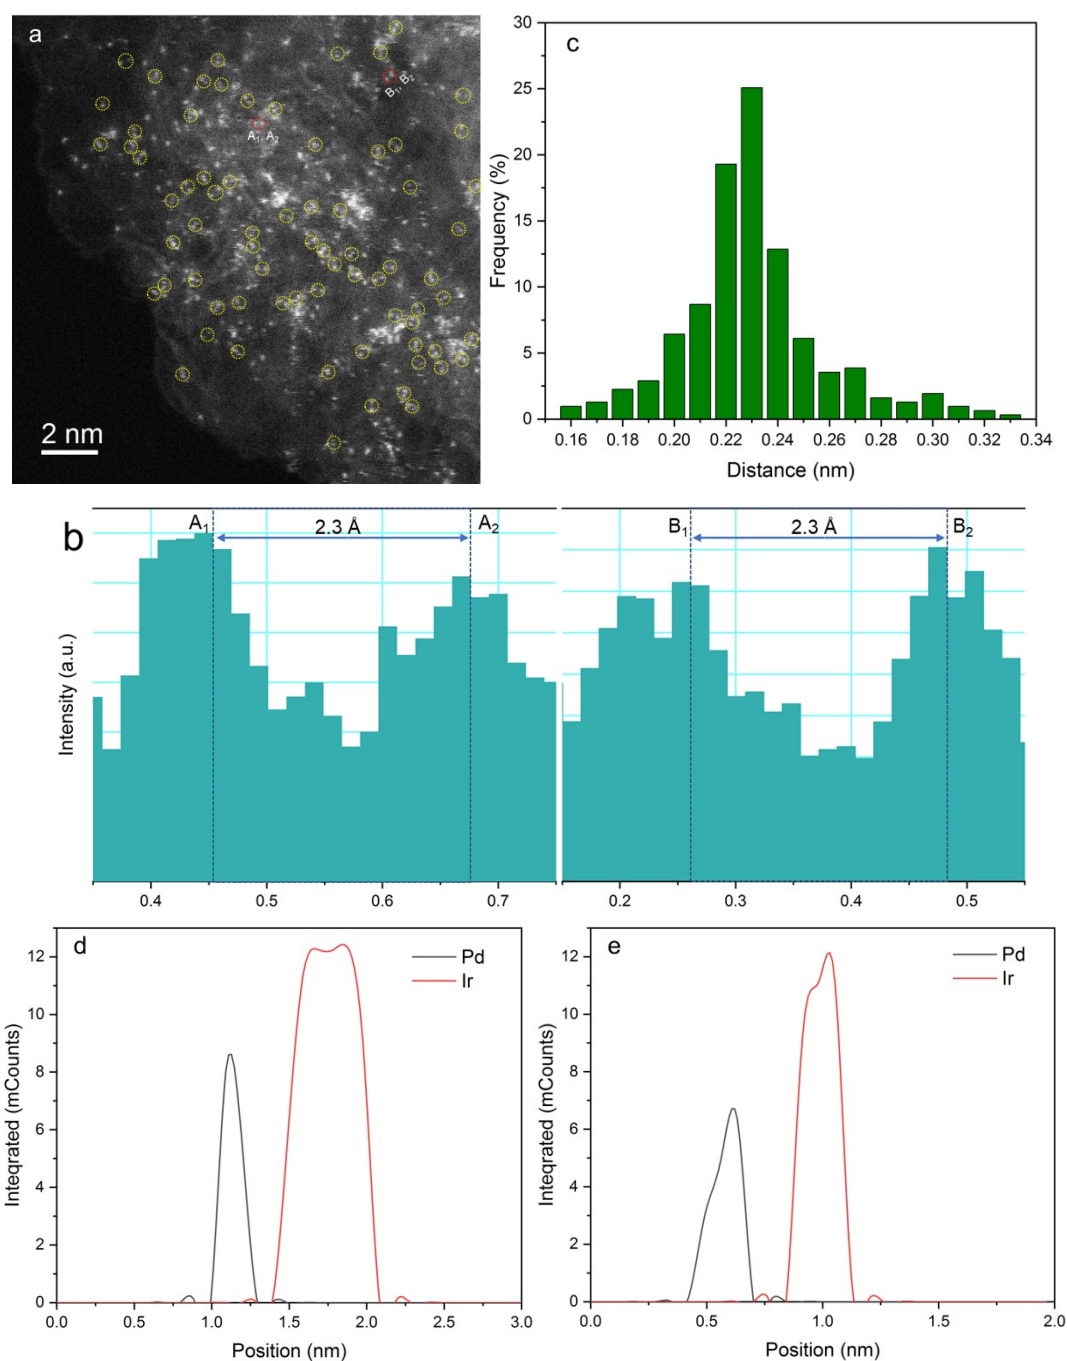

Figure S4 (a) Atomic-resolution HAAD-STEM image of Pd<sub>7</sub>Ir<sub>2</sub>/AC-B. (b) the corresponding Z-contrast analysis of region A and B in Fig. a. (c) Statistical distribution of dual single-atom distance. (d) and (e) EDS line scan spectra of dual single-atom in region A and B.

In this work, we further utilized the EDS spectra through line scanning method to identify the Pd-Ir pairs on Pd<sub>7</sub>Ir<sub>2</sub>/AC-B in Fig. S4. In Fig. S 4a, the bright spots were the atomically dispersed Pd and Ir atoms, and we highlighted the dual single-atom with yellow circle and the atom distance was calculated as 2.3 Å in Fig. S 4b according to the model in Fig. S1. Fig. S 4c listed the thorough statistical distribution

of interatomic distance, which mainly located nearby 2.3 Å by Z-contrast analysis. Furthermore, we chose two pairs of dual single-atom in region A and B labelled by red circles for EDS line scanning, and the spectra in Fig. S4 d and e proved the adjacent atom pairs were Pd-Ir atoms. It was worthy to mention that the atoms distance in Fig. S4 d and e was not 2.3 Å, which might be induced by the sample shift during the line scanning process.

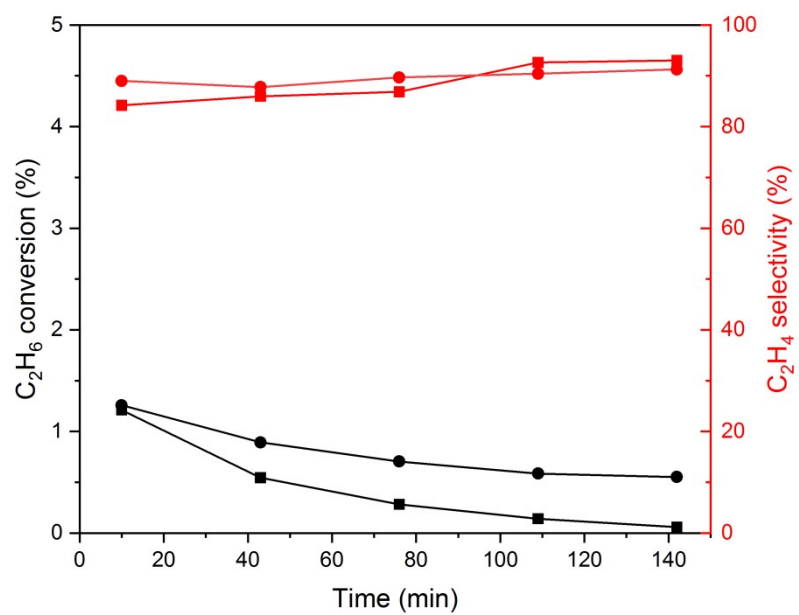

Figure S5 the  $C_2H_6$  conversion and  $C_2H_4$  selectivity over pristine AC support (circle symbol) and AC-B support (square symbol) at 500 °C .

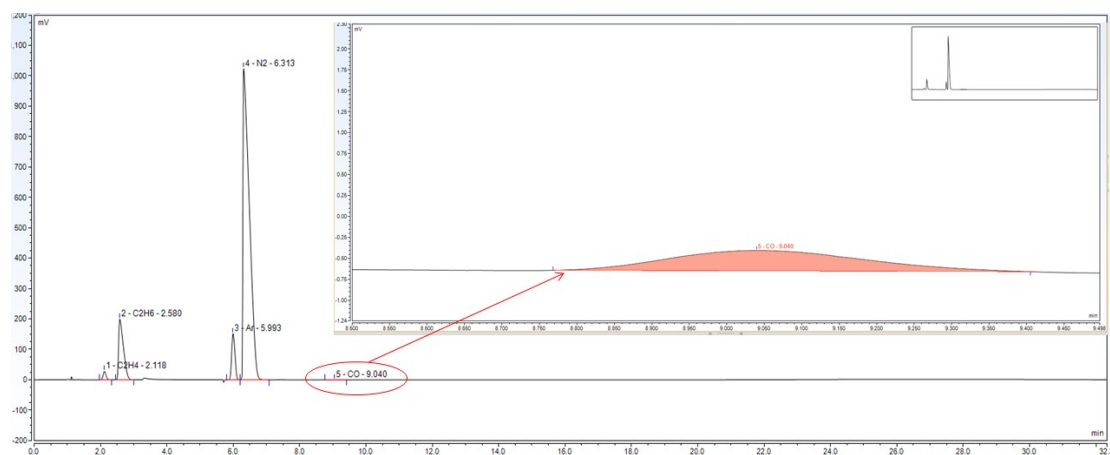

Figure S6 the gas-chromatography spectrum (TCD) of EDH over Pd7Ir2/AC after 1 h at 500 °C

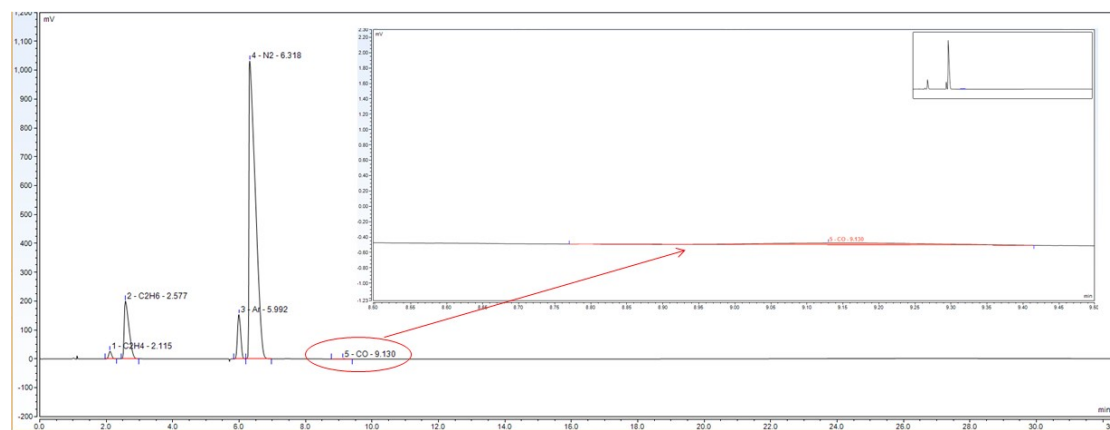

Figure S7 the gas-chromatography spectrum (TCD) of EDH over Pd7Ir2/AC-B after 1 h at 500 °C



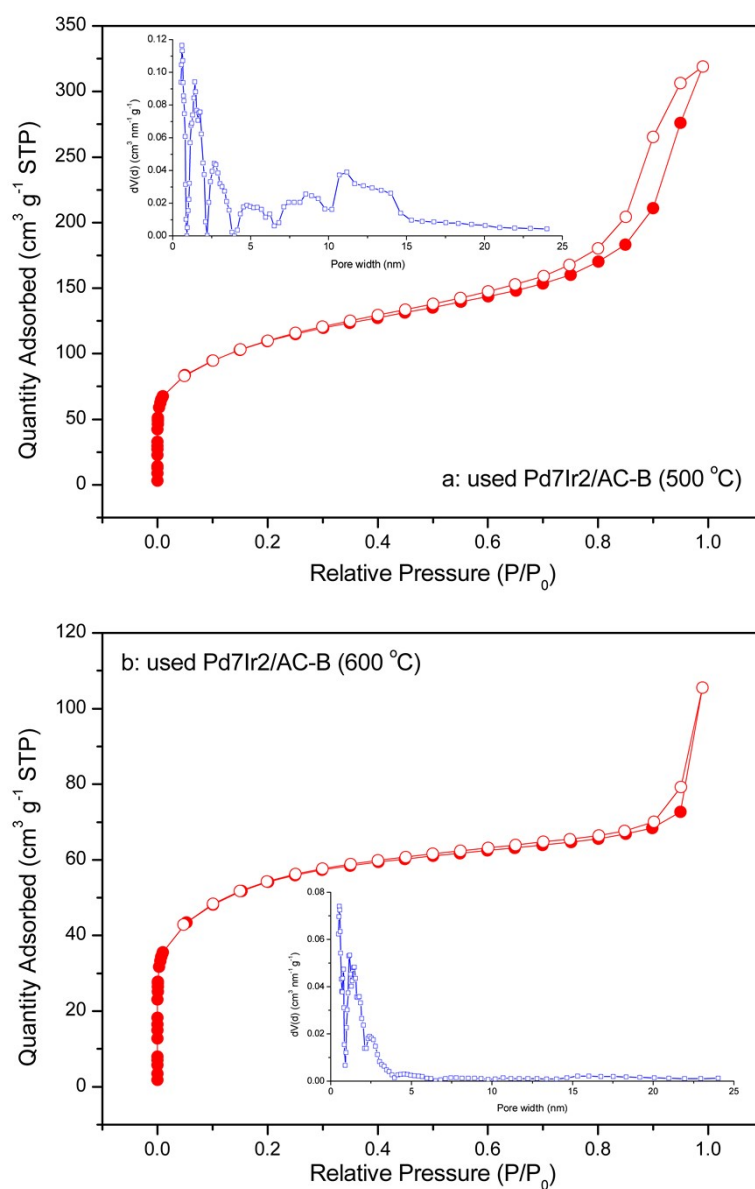

Figure S8 N<sub>2</sub> adsorption-desorption isotherm and pore distribution of used Pd<sub>7</sub>Ir<sub>2</sub>/AC-B at 500 °C (a) and 600 °C (b) after 340 min EDH reaction.

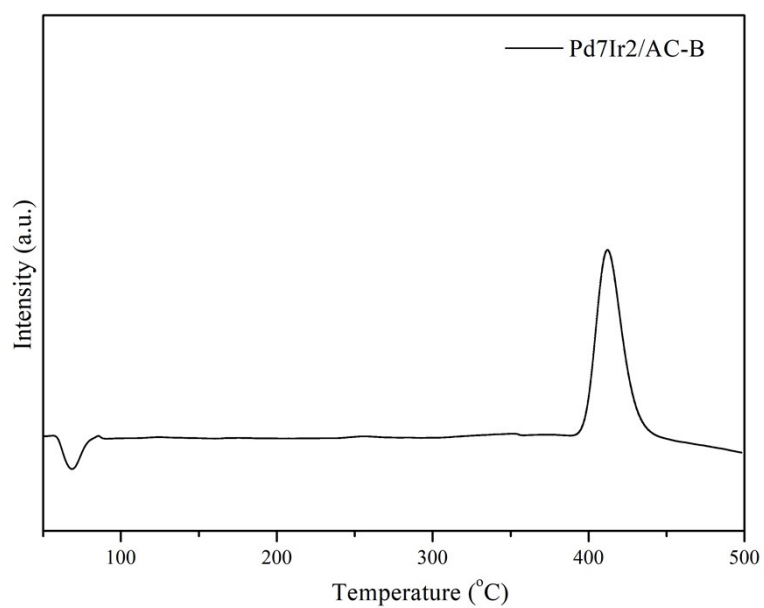

Figure S9 H<sub>2</sub>-TPR profile of Pd<sub>7</sub>Ir<sub>2</sub>/AC-B

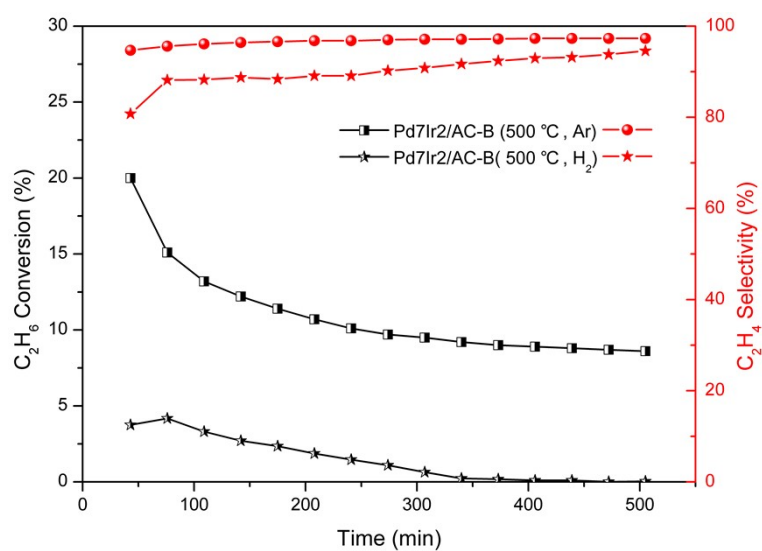

Figure S10 the EDH activity comparison over Pd<sub>7</sub>Ir<sub>2</sub>/AC-B after Ar or H<sub>2</sub> pretreatment from RT to 500 °C, respectively.

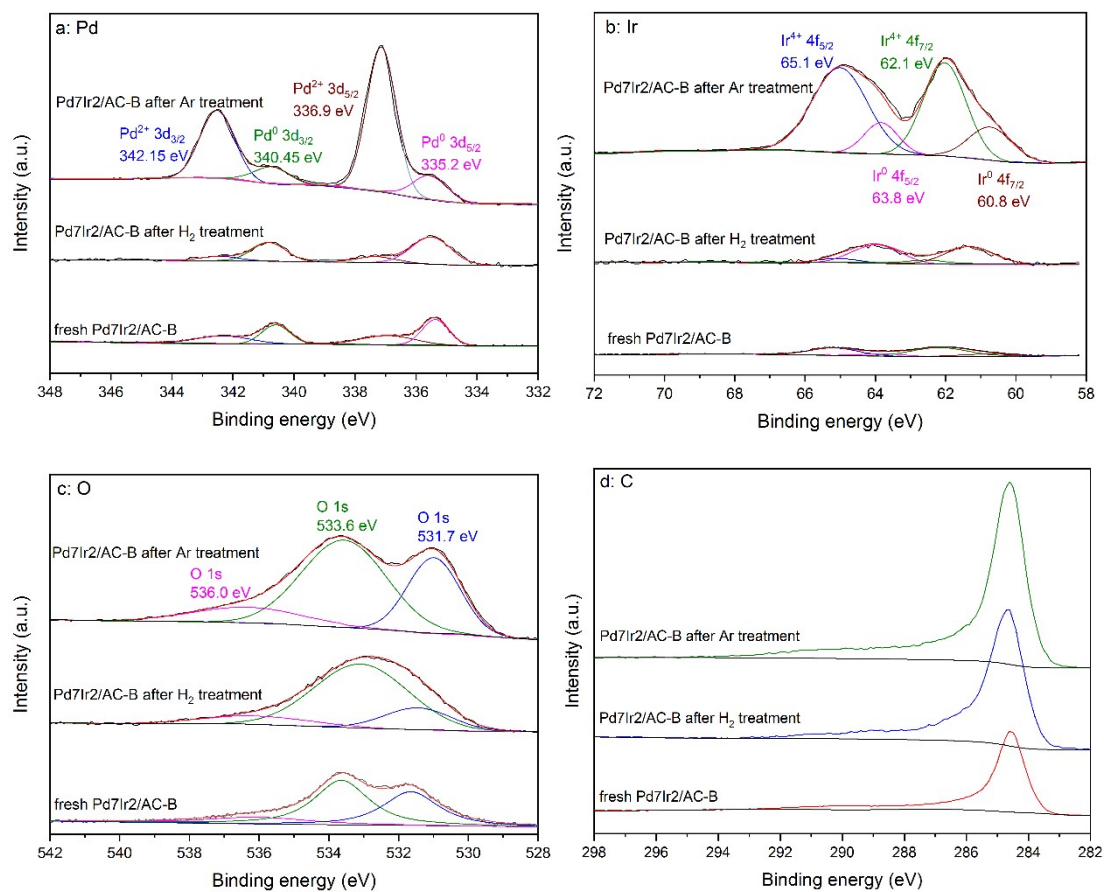

Figure S11 XPS spectra of (a) Pd 3d, (b) Ir 4f, (c) O 1s and (d) C 1s over fresh Pd7Ir2/AC-B and Pd7Ir2/AC-B after H<sub>2</sub> or Ar pretreatment at 500 °C.

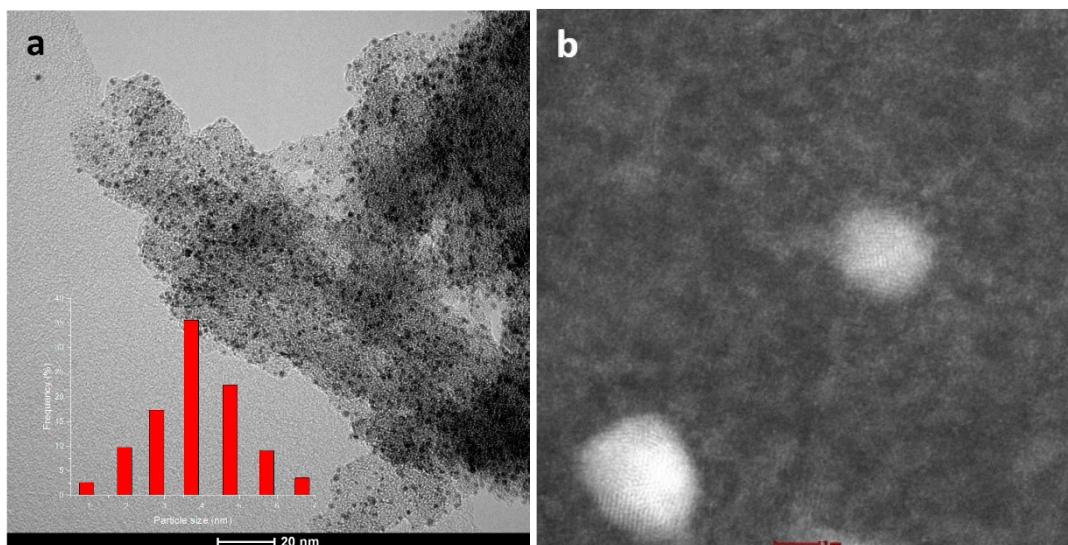

Figure S12 TEM image (scale bar 20 nm) (a) and atomic-resolution HAADF-STEM image (scale bar 2 nm) (b) of Pd7Ir2/AC-B-N

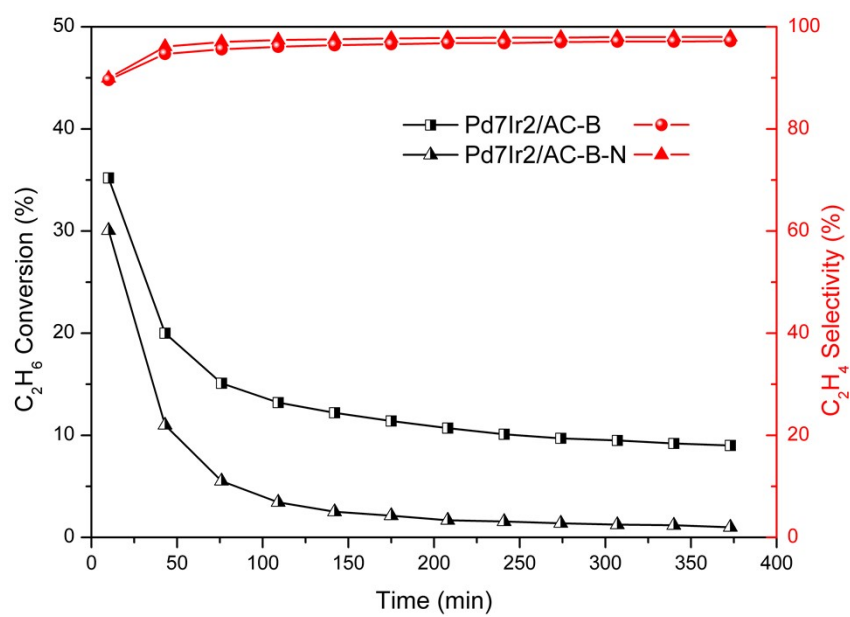

Figure S13 the EDH activity over Pd7Ir2/AC-B-N with Ar pretreatment from RT to 500 °C, respectively.

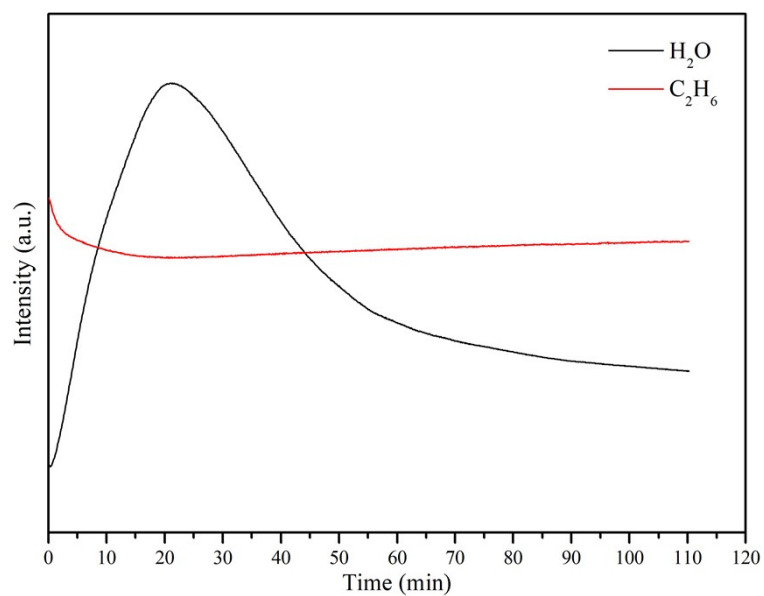

Figure S14 MS results of C<sub>2</sub>H<sub>6</sub> and H<sub>2</sub>O concentration profiles during EDH process over Pd7Ir2/AC-B at 500 °C. Prior to the activity test, the catalyst was pretreated by Ar from RT to 500 °C.

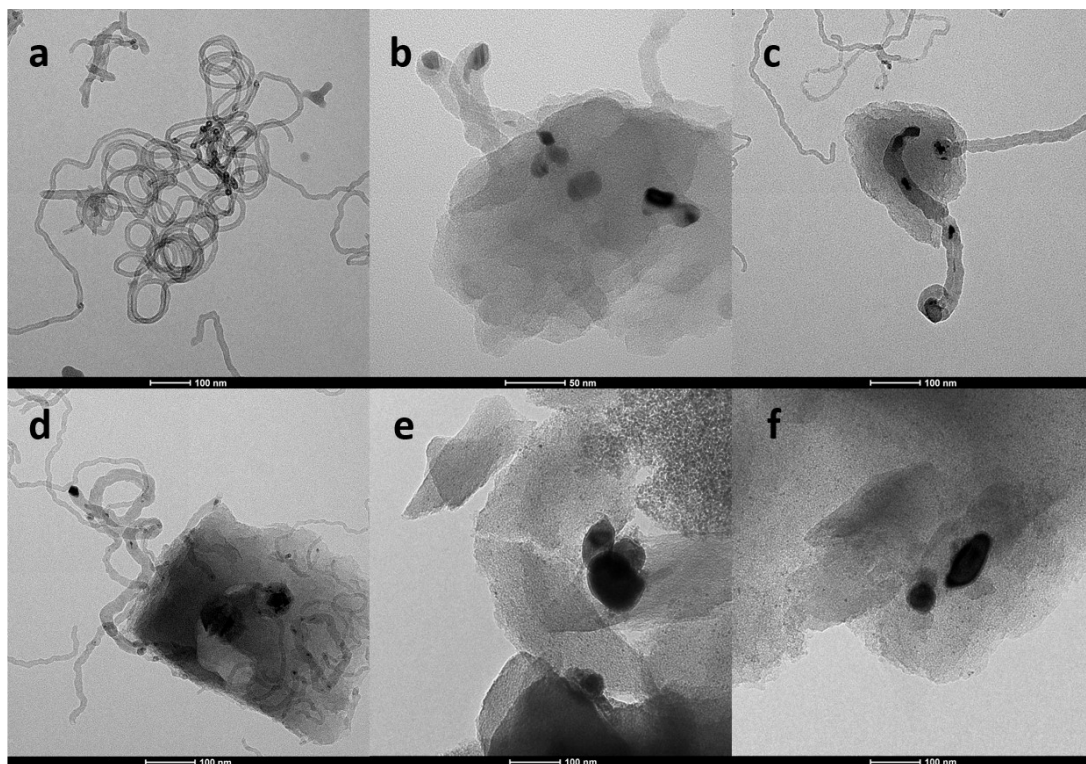

Figure S15 (a) and (b): TEM images of used Pd7Ir2/AC-B under 600 °C reaction; (c) and (d): TEM images of used Pd7Ir2/AC-B under 500 °C reaction; (e) and (f): TEM images of used Ir/AC-B under 500 °C reaction.

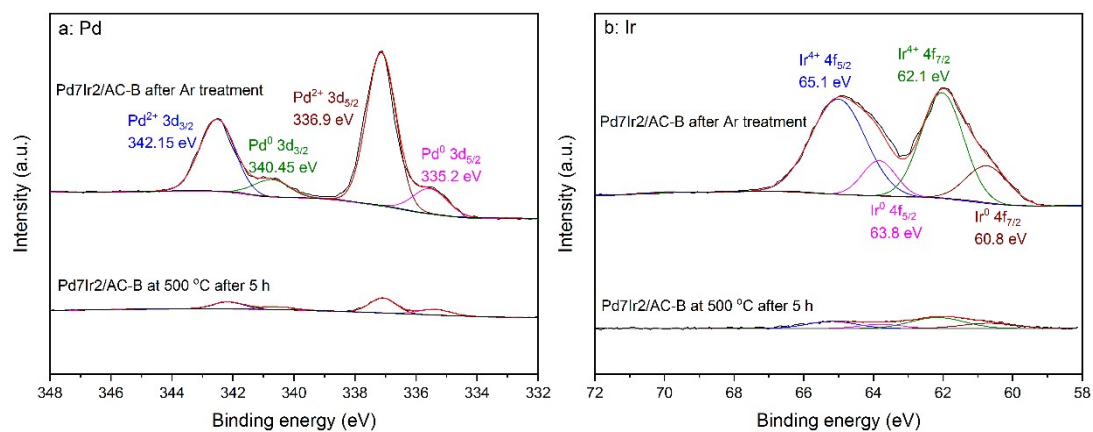

Figure S16 XPS spectra of (a) Pd 3d and (b) Ir 4f over Pd7Ir2/AC-B after Ar treatment prior to EDH activity test and after 5 h reaction at 500 °C.

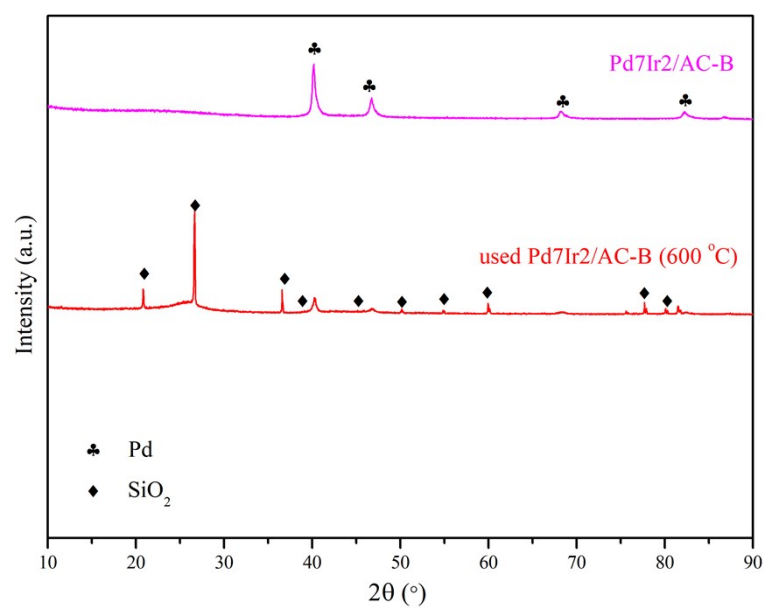

Figure S17 XRD profile of used Pd7Ir2/AC-B sample



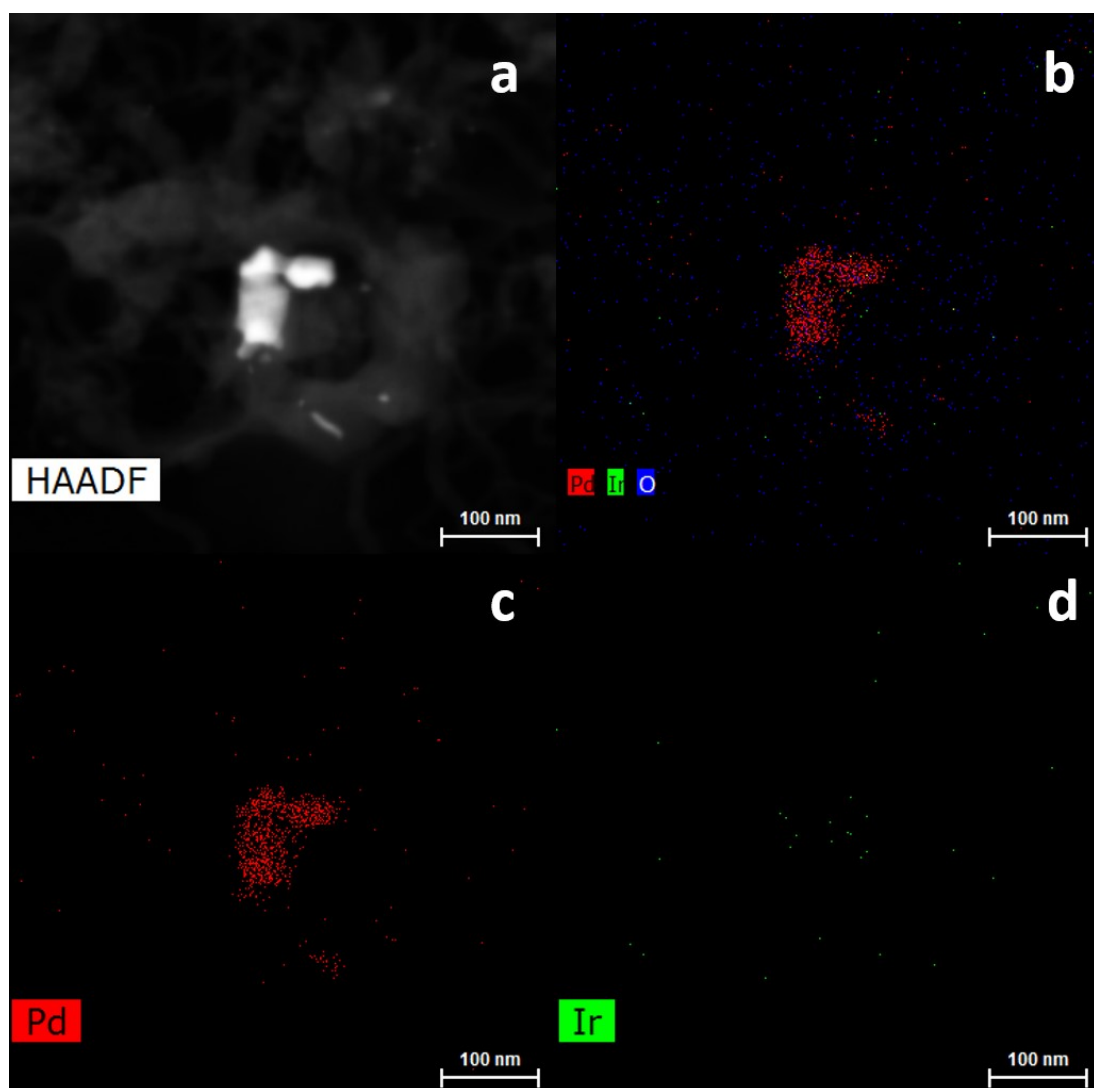

Fig. S18 STEM images of Pd, Ir and O mapping over used Pd<sub>7</sub>Ir<sub>2</sub>/AC-B after 600 °C reaction

Table S1 the comparison of direct EDH activity over various catalysts

| Reaction conditions | Sample in references                                     | Reaction activity                                                                                 | this work                                                                                          |
|---------------------|----------------------------------------------------------|---------------------------------------------------------------------------------------------------|----------------------------------------------------------------------------------------------------|
| 600 °C              | 2 wt% Fe/ZSM-5 <sup>1</sup>                              | 0.324 mmol C <sub>2</sub> H <sub>6</sub> :g <sub>Fe</sub> <sup>-1</sup> ·s <sup>-1</sup> /270 min | 2.88 mmol C <sub>2</sub> H <sub>6</sub> :g <sub>PdIr</sub> <sup>-1</sup> ·s <sup>-1</sup> /340 min |
| 600 °C              | 0.8 wt% Fe-silicalite-1 <sup>2</sup>                     | 0.86 mol C <sub>2</sub> H <sub>4</sub> :g <sub>Fe</sub> <sup>-1</sup> ·h <sup>-1</sup> /340 min   | 8.58 mol C <sub>2</sub> H <sub>4</sub> :g <sub>PdIr</sub> <sup>-1</sup> ·h <sup>-1</sup> /340 min  |
| 600 °C              | Pt-In(0.7) <sup>3</sup>                                  | R <sub>C<sub>2</sub>H<sub>6</sub></sub> :5.3 s <sup>-1</sup> (initial)                            | R <sub>C<sub>2</sub>H<sub>6</sub></sub> :2.25 s <sup>-1</sup> (10 min)                             |
| 550 °C              | PtSn/Mg(x-Ga)AlO <sup>4</sup>                            | R <sub>C<sub>2</sub>H<sub>6</sub></sub> :0.25 s <sup>-1</sup>                                     | R <sub>C<sub>2</sub>H<sub>6</sub></sub> :0.802 s <sup>-1</sup> (500 °C) <sup>a</sup>               |
| 650 °C              | 0.4 wt%Pt-meso-GaZSM-5 <sup>5</sup>                      | R <sub>C<sub>2</sub>H<sub>6</sub></sub> :0.46 s <sup>-1</sup>                                     | R <sub>C<sub>2</sub>H<sub>6</sub></sub> :2.25 s <sup>-1</sup> (600 °C)                             |
| 510 °C              | 1 wt% Pt-ETS-2 <sup>6</sup>                              | R <sub>C<sub>2</sub>H<sub>6</sub></sub> :0.009 s <sup>-1</sup> per Pt                             | R <sub>C<sub>2</sub>H<sub>6</sub></sub> :0.244 s <sup>-1</sup> per PdIr (500 °C)                   |
| 600 °C              | 2.2 wt% Pt <sub>3</sub> Ga/SiO <sub>2</sub> <sup>7</sup> | R <sub>C<sub>2</sub>H<sub>6</sub></sub> :0.032 s <sup>-1</sup> per Pt                             | R <sub>C<sub>2</sub>H<sub>6</sub></sub> :0.328 s <sup>-1</sup> per PdIr (600 °C)                   |
| 650 °C              | 0.8Cr/MFI <sup>8</sup>                                   | R <sub>C<sub>2</sub>H<sub>6</sub></sub> :4.1 s <sup>-1</sup> (initial)                            | R <sub>C<sub>2</sub>H<sub>6</sub></sub> :2.25 s <sup>-1</sup> (600 °C)                             |
| 600 °C              | PtIn <sub>2</sub> <sup>7</sup>                           | R <sub>C<sub>2</sub>H<sub>6</sub></sub> :1.3 s <sup>-1</sup>                                      | R <sub>C<sub>2</sub>H<sub>6</sub></sub> :2.25 s <sup>-1</sup> (600 °C)                             |
| 600 °C              | Pd-In-2.0 <sup>9</sup>                                   | R <sub>C<sub>2</sub>H<sub>6</sub></sub> :0.26 s <sup>-1</sup>                                     | R <sub>C<sub>2</sub>H<sub>6</sub></sub> :2.25 s <sup>-1</sup> (600 °C)                             |

a: this data was based on Pd7Ir2/AC-B sample in Fig. 5 and Fig. 10.

Table S2 Rate of C<sub>2</sub>H<sub>6</sub> conversion normalized by active Pd+Ir species <sup>a</sup>

| Sample               | Time/min | Reaction rate/h <sup>-1</sup> | Time/min | Reaction rate/h <sup>-1</sup> |
|----------------------|----------|-------------------------------|----------|-------------------------------|
| n                    |          |                               |          |                               |
| Pd/AC-B              | 10       | 7345.8                        | 340      | 863.0                         |
| Ir/AC-B              | 10       | 2724.5                        | 340      | 584.4                         |
| Pd7Ir2/AC-B          | 10       | 2887.2                        | 340      | 779.2                         |
| Pd7Ir2/AC-B (600 °C) | 10       | 8087.3                        | 340      | 1181.1                        |

a: the EDH activity results were utilized from Fig. 5 and Fig. 10.

Table S3 the mole ratios of Pd<sup>2+</sup>:Pd<sup>0</sup> and Ir<sup>4+</sup>:Ir<sup>0</sup> after various pretreatments, the results was

normalized by XPS peaks area from Fig. S11.

| Sample      | Pretreatment method                | Pd <sup>2+</sup> :Pd <sup>0</sup> | Ir <sup>4+</sup> :Ir <sup>0</sup> |
|-------------|------------------------------------|-----------------------------------|-----------------------------------|
| Pd7Ir2/AC-B | fresh sample                       | 1:1.26                            | 7:1                               |
| Pd7Ir2/AC-B | Ar treatment at 500 °C             | 5:1                               | 2.9:1                             |
| Pd7Ir2/AC-B | H <sub>2</sub> treatment at 500 °C | 1:4.7                             | 1:6                               |

## References:

1. Z. Yang, H. Li, H. Zhou, L. Wang, L. Wang, Q. Zhu, J. Xiao, X. Meng, J. Chen and F.-S. Xiao, *J. Am. Chem. Soc.*, 2020, **142**, 16429–16436.
2. L.-C. Wang, Y. Zhang, J. Xu, W. J. Diao, S. Karakalos, B. Liu, X. Y. Song, W. Wu, T. He and D. Ding, *Appl. Catal. B-Environ.*, 2019, **256**, 117816.
3. E. C. Wegener, Z. Wu, H.-T. Tseng, J. R. Gallagher, Y. Ren, R. E. Diaz, F. H. Ribeiro and J. T. Miller, *Catal. Today*, 2018, **299**, 146–153.
4. S. Fang, K. Zhang, C. Wang, L. Ma, Q. Zhang, Q. Liu, L. Chen, L. Chen, Q. Zhang and Z. Tian, *RSC Adv.*, 2017, **7**, 22836–22844.
5. Y. Wang, A. Caiola, B. Robinson, Q. Li and J. Hu, *Energy Fuels*, 2020, **34**, 3100–3109.
6. Z. Yu, J. A. Sawada, W. An and S. M. Kuznicki, *AIChE J.*, 2015, **61**, 4367–4376.
7. N. J. Escorcia, N. J. LiBretto, J. T. Miller and C. W. Li, *ACS Catal.*, 2020, **10**, 9813–9823.
8. S. De, S. Ould-Chikh, A. Aguilar, J.-L. Hazemann, A. Zitolo, A. Ramirez, S. Telalovic and J. Gascon, *ACS Catal.*, 2021, **11**, 3988–3995.
9. Z. Wu, E. C. Wegener, H.-T. Tseng, J. R. Gallagher, J. W. Harris, R. E. Diaz, Y. Ren, F. H. Ribeiro and J. T. Miller, *Catal. Sci. Technol.*, 2016, **6**, 6965–6976.
